# Supplementary material for: Joint effect of tobacco, alcohol, and oral HPV infection on head and neck cancer risk in the French West Indies
Source: PubMed Central journal article supplement (PMC7520253; doi:10.1002/cam4.3327), 2020-08-04
Supplement: CAM4-9-6854-s001.pdf [file CAM4-9-6854-s001.pdf]

## Supplementary Materials

Multivariate logistic regression analyses performed on observed data

**Supplementary table 1:** Multivariate OR of HNSCC and 95%CI associated with tobacco smoking, alcohol drinking and oral (observed data).

| Risk factor                        | Cases<br>n=145 | col%   | Controls<br>n=405 | col%   | OR    | 95%CI        |
|------------------------------------|----------------|--------|-------------------|--------|-------|--------------|
| <b>Tobacco smoking<sup>a</sup></b> |                |        |                   |        |       |              |
| Never smoker                       | 30             | (21.8) | 263               | (64.9) | 1     | ref          |
| <b>Smoking status</b>              |                |        |                   |        |       |              |
| Current smoker                     | 88             | (61.1) | 52                | (12.8) | 9.04  | (5.13-15.92) |
| Former smoker                      | 26             | (18.1) | 90                | (22.2) | 1.97  | (1.05-3.68)  |
| Missing                            | 1              |        | 0                 |        |       |              |
| <b>Quantity (cigarette/day)</b>    |                |        |                   |        |       |              |
| 1 to 10                            | 35             | (27.8) | 71                | (17.7) | 3.63  | (2.01-6.57)  |
| 11 to 20                           | 35             | (27.8) | 51                | (12.7) | 4.71  | (2.56-11.04) |
| >20                                | 26             | (20.6) | 17                | (4.2)  | 7.79  | (3.58-16.95) |
| Missing                            | 19             |        | 3                 |        |       |              |
| <b>Duration (years)</b>            |                |        |                   |        |       |              |
| 1 to 20                            | 9              | (6.5)  | 57                | (14.1) | 1.06  | (0.43-2.59)  |
| 21 to 30                           | 17             | (12.2) | 37                | (9.2)  | 3.19  | (1.51-6.76)  |
| 31 to 40                           | 42             | (30.2) | 23                | (5.7)  | 8.89  | (4.39-18.04) |
| > 40                               | 41             | (29.5) | 24                | (5.9)  | 10.84 | (5.33-22.05) |
| Missing                            | 6              |        | 1                 |        |       |              |

|                                                      |    |        |     |        |       |              |
|------------------------------------------------------|----|--------|-----|--------|-------|--------------|
| <b>≤ 20 cigarettes/day</b>                           |    |        |     |        |       |              |
| during ≤ 30 years                                    | 16 | (12.8) | 84  | (21.0) | 1.56  | (0.79-3.09)  |
| during >30 years                                     | 53 | (42.4) | 37  | (9.2)  | 9.76  | (5.29-18.02) |
| <b>&gt; 20 cigarettes/day</b>                        |    |        |     |        |       |              |
| during ≤ 30 years                                    | 6  | (4.8)  | 7   | (1.8)  | 6.03  | (1.80-20.23) |
| during > 30 years                                    | 20 | (16.0) | 10  | (2.5)  | 10.27 | (4.10-25.71) |
| Missing                                              | 20 |        | 4   |        |       |              |
| <b>Alcohol quantity (glasses/day)</b>                |    |        |     |        |       |              |
| Never or occasionally                                | 51 | (35.2) | 216 | (53.9) | 1     | ref          |
| <1 glass/day or <7 glasses/week                      | 8  | (5.5)  | 73  | (18.2) | 0.50  | (0.21-1.19)  |
| 1 to 5 glasses/day                                   | 45 | (31.0) | 84  | (21.0) | 1.61  | (0.88-2.96)  |
| >5 glasses/days                                      | 41 | (28.3) | 28  | (7.0)  | 2.50  | (1.18-5.29)  |
| Missing                                              | 0  |        | 4   |        |       |              |
| <b>Alcohol duration<sup>b</sup> (years)</b>          |    |        |     |        |       |              |
| ≤ 30                                                 | 25 | (17.2) | 129 | (31.9) | 1     | ref          |
| 31-45                                                | 67 | (46.2) | 161 | (39.8) | 1.75  | (0.87-3.45)  |
| > 45                                                 | 26 | (17.9) | 59  | (14.8) | 4.51  | (1.77-11.45) |
| Missing                                              | 27 |        | 56  |        |       |              |
| <b>Type of beverage<sup>b</sup> (daily drinking)</b> |    |        |     |        |       |              |
| Wine                                                 | 38 | (26.2) | 54  | (13.3) | 1.43  | (0.78-2.64)  |
| Beer                                                 | 34 | (23.5) | 35  | (8.6)  | 2.02  | (1.06-3.83)  |
| Rum                                                  | 75 | (51.7) | 61  | (15.1) | 3.01  | (1.76-5.17)  |
| Other strong spirits                                 | 13 | (9.0)  | 12  | (3.0)  | 1.73  | (0.64-4.70)  |
| <b>Oral HPV Status<sup>c</sup></b>                   |    |        |     |        |       |              |
| HPV-Negative                                         | 60 | (65.2) | 228 | (73.9) |       | ref          |
| Any HPV                                              | 32 | (34.8) | 80  | (26.1) | 1.23  | (0.66-2.30)  |

|                   |    |        |    |        |      |             |
|-------------------|----|--------|----|--------|------|-------------|
| HPV-Non-high risk | 13 | (14.1) | 50 | (16.3) | 0.74 | (0.33-1.70) |
| HPV-High risk     | 19 | (20.7) | 30 | (9.8)  | 2.10 | (0.95-4.88) |
| Missing           | 53 |        | 97 |        |      |             |

---

French West Indies, 2013-2016

a: Model adjusted for age, sex, recruitment site, alcohol consumption (glasses/day)

b: Model adjusted for age, sex, recruitment site, Tobacco smoking as the combination of quantity (cigarettes/day) and duration (years)

c: Model adjusted for age, sex, recruitment site, Tobacco smoking status, alcohol consumption (glasses/day)

**Supplementary table 2:** Multivariate OR, their 95% CI, and measures of two-way interactions between risk factors for HNSCC, and by subsite (observed data).

| Risk factor combinations               | All cases |                  | Oropharynx |                  | Non-Oropharynx |                 |
|----------------------------------------|-----------|------------------|------------|------------------|----------------|-----------------|
|                                        | OR        | (95%CI)          | OR         | (95%CI)          | OR             | (95%CI)         |
| <b>Smoking and Alcohol<sup>a</sup></b> |           |                  |            |                  |                |                 |
| Never Smoker-Non Drinker               | 1         | (ref)            | 1          | (ref)            | 1              | (ref)           |
| Never Smoker-Drinker                   | 1.97      | (0.86-4.52)      | 2.69       | (0.72-10.05)     | 1.79           | (0.64-5.01)     |
| Ever smoker-Non drinker                | 3.57      | (1.89-6.74)      | 5.59       | (2.06-15.21)     | 2.75           | (1.24-6.11)     |
| Ever Smoker-Drinker                    | 14.31     | (7.97-25.68)     | 19.13      | (7.46-49.08)     | 13.23          | (6.62-26.45)    |
| Ψ (95%CI)                              | 2.04      | (0.76-5.45)      | 1.27       | (0.29-5.66)      | 2.69           | (0.80-9.11)     |
| RERI (95% CI)                          | 9.77      | (3.06 to 16.49)  | 11.85      | (-1.29 to 25.00) | 9.69           | (2.25 to 17.13) |
| <b>Smoking and Hr-HPV<sup>b</sup></b>  |           |                  |            |                  |                |                 |
| Never Smoker-Hr-HPV-                   | 1         | (ref)            | 1          | (ref)            | 1              | (ref)           |
| Never Smoker-Hr-HPV+                   | 7.81      | (2.35-25.88)     | 9.86       | (1.86-52.36)     | 3.30           | (0.60-18.03)    |
| Ever smoker-Hr-HPV-                    | 6.67      | (3.29-13.49)     | 9.66       | (3.19-29.23)     | 5.22           | (2.22-12.26)    |
| Ever Smoker-Hr-HPV+                    | 6.70      | (2.39-18.76)     | 7.91       | (1.76-35.64)     | 5.53           | (1.66-18.46)    |
| Ψ (95%CI)                              | 0.13      | (0.03-0.57)      | 0.08       | (0.01-0.64)      | 0.32           | (0.05-2.52)     |
| RERI (95% CI)                          | -6.78     | (-17.86 to 4.30) | -10.61     | (-30.61 to 9.40) | -1.99          | (-9.88 to 5.91) |
| <b>Alcohol and Hr-HPV<sup>c</sup></b>  |           |                  |            |                  |                |                 |
| Non Drinker-Hr-HPV-                    | 1         | (ref)            | 1          | (ref)            | 1              | (ref)           |
| Non Drinker-Hr-HPV+                    | 6.54      | (2.12-20.15)     | 7.83       | (1.73-35.38)     | 3.03           | (0.55-16.68)    |
| Drinker-Hr-HPV-                        | 5.32      | (2.60-10.91)     | 7.92       | (2.79-22.52)     | 4.30           | (1.78-10.41)    |
| Drinker-Hr-HPV+                        | 4.18      | (1.38-12.61)     | 4.95       | (1.01-24.40)     | 3.40           | (0.96-12.10)    |
| Ψ (95%CI)                              | 0.12      | (0.03-0.56)      | 0.08       | (0.01-0.60)      | 0.26           | (0.05-2.62)     |
| RERI (95% CI)                          | -6.68     | (-15.65 to 2.28) | -9.80      | (-25.66 to 4.94) | -2.93          | (-9.89 to 4.04) |

French West Indies, 2013-2016

a: Model adjusted for age, sex, recruitment site

b: Model adjusted for age, sex, recruitment site and ever daily alcohol consumption

c: Model adjusted for age, sex, recruitment site, Tobacco smoking as the combination of quantity (cigarettes/day) and duration (years)

$\Psi$ : Phi, measure of interaction on a multiplicative scale (interaction term)

RERI: Relative Excess Risk due to Interaction

**Supplementary table 3:** Multivariate OR, their 95% CI, and measures of two-way interaction of combined exposures to tobacco smoking and alcohol drinking for HNSCC stratified by Hr-HPV status (observed data).

| Risk factor combinations               | HPV-Hr-Negative |                | HPV-Hr-Positive |               |
|----------------------------------------|-----------------|----------------|-----------------|---------------|
|                                        | OR              | 95% CI         | OR              | 95% CI        |
| <b>Smoking and Alcohol<sup>a</sup></b> |                 |                |                 |               |
| Never Smoker –Non Drinker              | 1               | (ref)          | 1               | (ref)         |
| Never Smoker -Drinker                  | 6.71            | (1.95-23.09)   | 0.40            | (0.03-4.83)   |
| Ever smoker- Non drinker               | 6.49            | (2.14-19.75)   | 0.40            | (0.05-3.22)   |
| Ever Smoker- Drinker                   | 43.66           | (15.43-123.54) | 1.94            | (0.44-8.57)   |
| Ψ (95%CI)                              | 1.00            | (0.23-4.28)    | 12.25           | (0.47-319.23) |
| RERI (95% CI)                          | 31.46           | (10.09-52.83)  | 2.14            | (1.23-3.06)   |

French West Indies, 2013-2016

a: Model adjusted for age, sex, recruitment site

Ψ: multiplicative interaction parameter

RERI: Relative Excess Risk due to Interaction
